# Supplementary material for: Hydrogen Peroxide Generation as an Underlying Response to High Extracellular Inorganic Phosphate (Pi) in Breast Cancer Cells
Source: MDPI journal article supplement (doi:10.3390/ijms221810096), 2021-09-18
Supplement: s1 [file s1]

## Supplementary Files

### Material and Methods

#### Quantitative PCR

Total RNA was extracted using TRIzol Reagent (Thermo Fisher Scientific) as described by manufacturer's manual from MDA-MB-231, MCF-7 or MCF-10 cells. After treatment of RNA with DNase I, 1 µg of total RNA was submitted to reverse transcription using the High-Capacity cDNA reverse transcription kit (Thermo Fisher Scientific). For qPCR assay, 500 ng/ml cDNA was used per well, using a FastStart Master SYBR Green I Kit (Roche). qPCR was carried in StepONEPlus Real Time PCR System (Applied Biosystems). The primers for amplification are shown in Table S1. Gene expression data were normalized to an endogenous reference  $\beta$ -actin (ACTB) as previously described (Lacerda-Abreu et al., 2019 and 2018) and according to the manufacturer's instructions.

**Table S1. Primers sequences**

| Sequence name | Sequence                  | Reference |
|---------------|---------------------------|-----------|
| NaPi 1_For    | CGTATGTCTTCTCTGGTTCGTTCTG | [31].     |
| NaPi 1_Rev    | CGTAAACTACCAGTGGAAATAGCCC | [31].     |
| NaPi-IIa_For  | GTGGCCTCCTTCAACATCCAT     | [31].     |
| NaPi-IIa_Rev  | CTGTAAGGAGTCTGGGTGGC      | [31].     |
| NaPi-IIb_For  | CCCAGCTTATAGTGGAGAGCTTC   | [31].     |
| NaPi-IIb_Rev  | GCACCAAATCTTGACAAGACTCTTG | [31-32].  |
| NaPi-IIc_For  | GAATTTTCAGAGGGCTTTTCAGCG  | [31].     |
| NaPi-IIc_Rev  | GAGTCCAACTGCACGATGAGG     | [31].     |
| PiT1_For      | CCTAATGGTTTGCGAGCTTTGC    | This work |
| PiT1_Rev      | GAACCAGACGATAAGGGCACAG    | This work |
| PiT2_For      | GATGACAGCACCATCCCG        | This work |
| PiT2_Rev      | GGTACACATGACCGTCGCTC      | This work |
| ACTB_For      | TGACGTGGACATCCGCAAAG      | [31-32].  |
| ACTB_Rev      | CTGGAAGGTGGACAGCGAGG      | [31-32].  |

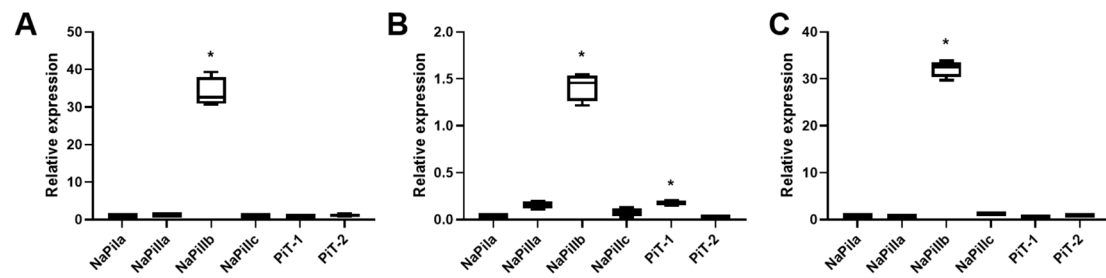

**Figure S1: Comparison of transcription level of Pi transporters in MCF-10A, MCF-7 and MDA-MB-231 cells.** Total RNA was purified from the three different cell lineages, as described in Material & Methods, and qPCR was carried. Gene expression data were normalized to an endogenous reference  $\beta$ -actin (ACTB). The results are the means  $\pm$  SE of 4 experiments with different cell suspensions. Asterisks mark significant differences ( $p \leq 0.05$ ) from the NaPi1a of MCF-10 cells (A), as determined by One-Way analysis of variance (ANOVA), using Dunnett's multiple comparisons test.

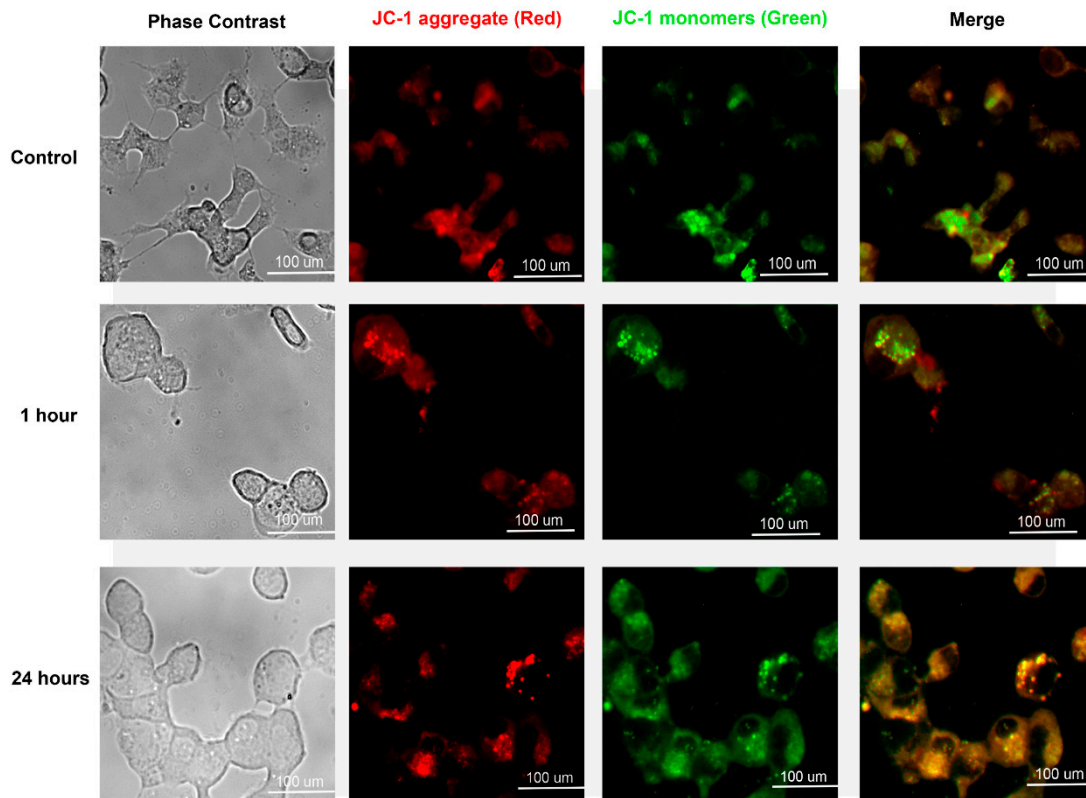

**Figure S2: Mitochondrial membrane potential ( $\Delta\Psi_m$ ) by JC-1 staining MDA-MB-231 cells treated with 1 mM Pi and 8 mM Pi (1 or 24 hours).** Representative phase contrast images (left panels) and JC-1 fluorescence images (right panels). MDA-MB-231 mitochondrial membrane potential was measured by JC-1, an indicator of mitochondrial function, red fluorescence represents the dependent aggregate of mitochondrial potential JC-1, after depolarization, green fluorescence remains, indicating JC-1 monomeric. The ratio of red/green fluorescence was markedly higher in MDA-MB-231 treated with 8 mM Pi for 1 h. MDA-MB-231 treated by 8 mM Pi for 24 h showed the same red/green fluorescence ratio compared with control cells (1 mM Pi). Slides were observed in EVOS fl Fluorescence Microscope from AMGe and images were processed using Adobe Photoshop software.

**Table S2. Predicted phosphorylation sites with scores  $\geq 0.60$  and specific for PKC in the primary sequences of NaPillb isoform 1 and 2**

| NaPillb isoform 1  |       | NaPillb isoform 2  |       |
|--------------------|-------|--------------------|-------|
| Amino acid         | Score | Amino acid         | Score |
| Thr <sup>37</sup>  | 0.718 | Thr <sup>35</sup>  | 0.871 |
| Thr <sup>113</sup> | 0.638 | Thr <sup>57</sup>  | 0.654 |
| Thr <sup>136</sup> | 0.654 | Ser <sup>82</sup>  | 0.648 |
| Ser <sup>161</sup> | 0.648 | Thr <sup>86</sup>  | 0.650 |
| Thr <sup>165</sup> | 0.650 | Thr <sup>153</sup> | 0.717 |
| Thr <sup>232</sup> | 0.717 | Thr <sup>163</sup> | 0.786 |
| Thr <sup>242</sup> | 0.786 | Thr <sup>176</sup> | 0.916 |
| Thr <sup>255</sup> | 0.916 | Thr <sup>217</sup> | 0.686 |
| Thr <sup>296</sup> | 0.686 | Thr <sup>304</sup> | 0.831 |
| Thr <sup>383</sup> | 0.831 | Thr <sup>306</sup> | 0.725 |
| Thr <sup>385</sup> | 0.725 | Thr <sup>336</sup> | 0.754 |
| Thr <sup>415</sup> | 0.754 | Thr <sup>341</sup> | 0.783 |
| Thr <sup>420</sup> | 0.783 | Ser <sup>388</sup> | 0.846 |
| Thr <sup>467</sup> | 0.846 | Thr <sup>396</sup> | 0.926 |
| Thr <sup>475</sup> | 0.926 | Thr <sup>426</sup> | 0.641 |
| Thr <sup>505</sup> | 0.641 | Ser <sup>431</sup> | 0.662 |
| Ser <sup>510</sup> | 0.662 |                    |       |

Analysis of phosphorylatable sites for NaPillb isoform 1 (GenBank: O95436) and NaPillb isoform 2 (GenBank: O95436.2) using NetPhosK 3.1 prediction software
